# Supplementary material
Source: publisher figshare collection journal article supplement (https://asha.figshare.com/ndownloader/files/34208699)
Supplement: Supplementary file 1 [file 34208699]

**Supplemental Material S1.** Demographic characteristics of the total sample, with comparisons for younger (18–39 years) and older ( $\geq 40$  years) adults.

| Demographic variable                             | Total<br>( <i>N</i> = 61) | Younger<br>( <i>n</i> = 28) | Older<br>( <i>n</i> = 33) | <i>p</i> -value |
|--------------------------------------------------|---------------------------|-----------------------------|---------------------------|-----------------|
| Hearing group                                    |                           |                             |                           |                 |
| <i>Pass</i>                                      | 33 (54.1%)                | 18 (64.3%)                  | 15 (45.5%)                | .141            |
| <i>Fail</i>                                      | 28 (45.9%)                | 10 (35.7%)                  | 18 (54.5%)                |                 |
| Education ( <i>n</i> )                           |                           |                             |                           |                 |
| <i>No degree</i>                                 | 15 (24.6%)                | 4 (14.3%)                   | 13 (39.4%)                | .029            |
| <i>Degree</i>                                    | 46 (75.4%)                | 24 (85.7%)                  | 20 (60.6%)                |                 |
| Gender ( <i>n</i> )                              |                           |                             |                           |                 |
| <i>Male</i>                                      | 18 (29.5%)                | 8 (28.6%)                   | 10 (30.3%)                | .295            |
| <i>Female</i>                                    | 43 (70.5%)                | 20 (71.4%)                  | 23 (69.7%)                |                 |
| Hearing aid user ( <i>n</i> )                    | 21 (34.4%)                | 6 (24.4%)                   | 15 (45.5%)                | .010            |
| Years using hearing aid ( <i>M</i> , <i>SD</i> ) | 15.84 (12.66)             | 12.00 (0.00)                | 16.06 (13.00)             | .765            |
| Hours per day using hearing aid ( <i>n</i> )     |                           |                             |                           |                 |
| <i>None</i>                                      | 1 (5.0%)                  | 0 (0.0%)                    | 0 (0%)                    | < .001          |
| < 1 hour                                         | 1 (5.0%)                  | 0 (0.0%)                    | 1 (3.1%)                  |                 |
| 4–8 hours                                        | 4 (20.0%)                 | 1 (3.6%)                    | 3 (9.4%)                  |                 |
| > 8 hours                                        | 14 (70.0%)                | 5 (17.9%)                   | 10 (31.3%)                |                 |
